# Supplementary material for: Coccolithophorids precipitate carbonate in clumped isotope equilibrium with seawater
Source: Copernicus journal article supplement (doi:10.5194/egusphere-2023-2581), 2023-11-09
Supplement: Supplementary file 2 [file egusphere-2023-2581-supplement.zip]

Archive with 3 entries (3 files):
- Supplement_submitted/Supplement figures.pdf
- Supplement_submitted/Table S1.xlsx
- Supplement_submitted/Table S2.xlsx
