# Supplementary material for: Coccolithophorids precipitate carbonate in clumped isotope equilibrium with seawater
Source: Copernicus journal article supplement (doi:10.5194/egusphere-2023-2581), 2023-11-09
Supplement: Supplementary file 2 [file egusphere-2023-2581-supplement.zip › Supplement_submitted/Table S1.xlsx]

## Sheet: Data
Species	Cleaning method	Culture setup type	Temperature (°C)	Temperature (1/T2)	Cell count (cells/mL)	Cell radius (um)	Growth rate (1/day)	t	t SD	pH (NBS scale)	DIC (uM)	CO2aq (uM)	Initial DIC (uM)	ΔDIC (uM)	ΔDIC (%)	Initial pH (NBS scale)	ΔpH (NBS scale)	ΔpH (%)	Initial CO2aq (uM)	ΔCO2aq (uM)	ΔCO2aq (%)	Carbonate chemistry	δ13CDIC (VPDB)	δ13CDIC SD (VPDB)	δ18Osw (VSMOW)	δ18Osw SD (VSMOW)	δ13Cc (VPDB)	δ13Cc SD (VPDB)	Δ13Cc-DIC (VPDB)	δ18Oc (VPDB)	δ18Oc SD (VPDB)	ΔΔ18Ooff (VSMOW)
G. oceanica	Oxi NH3	Batch	12	12.2985	57112	3.573	0.34	0.0394514	0.00746834	8.26	2390.47	14.6632	2484.45	93.9793	3.7827	8.22	-0.04	0.486618	16.8239	2.16065	12.8428	Included	-3.71062	0.470276	-10.5701	0.462612	-4.10615	0.0607059	-0.395533	-8.04154	0.13467	0.47829
G. oceanica	Oxi NaOH	Continuous	15	12.0438	143600	3.5005	0.67	0.0518115	0.0434896	8.01	2034.73	21.5556	2112.01	77.2763	3.65891	8.03	0.02	0.249066	21.3236	-0.23193	1.08767	Included	-4.0529	1.12094	-9.57677	0.306408	-4.92077	0.0837084	-0.867866	-8.68923	0.205631	-0.530325
G. oceanica	Oxi NH3	Continuous	15	12.0438	108200	3.3125	0.55	0.0262822	0.0319052	8.06	3514.9	33.0093	4028.99	514.092	12.7598	8.01	-0.05	0.62422	42.6824	9.67308	22.6629	Included	-3.83275	0.12598	-9.57677	0.306408	-3.8075	0.126368	0.0252501	-8.409	0.188624	-0.247678
G. oceanica	Oxi NH3	Continuous	15	12.0438	156600	3.1605	0.55	0.0206011	0.0250341	8.07	4383.24	40.1799	4028.99	-354.248	8.79247	8.01	-0.06	0.749064	42.6824	2.50251	5.8631	Included	-3.8975	0.12598	-10.4866	0.364503	-4.136	0.0174356	-0.2385	-9.213	0.0600083	-0.139736
G. oceanica	Oxi NH3	Continuous	18	11.7969	160500	3.4155	0.53	0.124186	0.0018124	8.4	1839.97	6.94128	1874.11	34.146	1.82198	8.48	0.08	0.943396	5.72942	-1.21186	21.1516	Included	-4.36775	0.683204	-10.3032	0.137732	-5.515	0.055	-1.14725	-9.33583	0.126587	0.185527
G. oceanica	Oxi NH3	Continuous	18	11.7969	262600	3.223	0.53	0.102297	0.0105971	8.28	1549.25	7.95163	1874.11	324.86	17.3341	8.31	0.03	0.361011	8.91331	0.96168	10.7893	Included	-3.883	0.683204	-10.3032	0.137732	-5.295	0.139732	-1.412	-9.67583	0.335074	-0.157736
G. oceanica	Oxi NH3	Continuous	18	11.7969	68978	3.3785	0.43	0.0375842	0.0255339	8.08	2182.16	18.4063	2207.96	25.7978	1.1684	7.98	-0.1	1.25313	23.7284	5.32208	22.4291	Included	-5.10202	0.998452	-10.617	0.163126	-4.55857	0.0591435	0.543453	-10.3629	0.138483	-0.534558
G. oceanica	Oxi NH3	Continuous	18	11.7969	84360	3.307	0.43	0.0280689	0.019206	7.96	2139.56	24.1245	2207.96	68.4045	3.09808	7.98	0.02	0.250627	23.7284	-0.396043	1.66907	Included	-3.69	0.998452	-10.617	0.163126	-4.635	0.0313392	-0.945	-10.2714	0.0969431	-0.442177
G. oceanica	Oxi NaOH	Continuous	18	11.7969	64082	3.3835	0.43	0.0249862	0.0059216	7.91	2182.16	27.7278	2207.96	25.7978	1.1684	7.98	0.07	0.877193	23.7284	-3.99934	16.8546	Included	-5.10202	0.998452	-10.617	0.163126	-4.5875	0.0163936	0.514524	-10.3838	0.0266634	-0.55567
G. oceanica	Oxi NH3	Continuous	18	11.7969	79178	3.1465	0.34	0.0119644	0.0212213	7.99	4058.52	42.5789	3923.76	-134.761	3.43448	8.02	0.03	0.374065	38.2902	-4.2887	11.2005	Included	-3.87525	0.348033	-10.3032	0.137732	-4.14	0.0187083	-0.26475	-9.23	0.0674537	0.292352
G. oceanica	Oxi NH3	Continuous	21	11.5575	72983	3.396	0.82	0.236027	0.00373593	8.48	1960.54	5.61825	1965.89	5.35925	0.272611	8.5	0.02	0.235294	5.33801	-0.280238	5.24985	Included	-3.9606	0.248362	-10.58	0.189741	-4.19667	0.0309121	-0.236071	-10.5207	0.069423	-0.109783
G. oceanica	Oxi NH3	Continuous	21	11.5575	103700	3.361	0.75	0.194078	0.00373593	8.29	1311.84	6.18493	1498.91	187.069	12.4803	8.34833	0.0583333	0.698742	6.08048	-0.104457	1.71791	Included	-4.02796	0.248362	-10.58	0.189741	-3.27846	0.0560008	0.749502	-10.5038	0.141342	-0.0927839
G. oceanica	Oxi NH3	Continuous	21	11.5575	103701	3.361	0.75	0.194078	0.00373593	8.29	1311.84	6.18493	1498.91	187.069	12.4803	8.34833	0.0583333	0.698742	6.08048	-0.104457	1.71791	Included	-4.02796	0.248362	-10.58	0.189741	-3.33786	0.102412	0.690107	-10.6064	0.240315	-0.196461
G. oceanica	Oxi NH3	Continuous	21	11.5575	86209	3.36825	0.75	0.157626	0.0159403	8.61	3802.69	7.63165	3897.44	94.7466	2.43099	8.68	0.07	0.806452	6.41645	-1.21519	18.9387	Included	-3.065	0.250846	-10.7207	0.498665	-3.67909	0.0308823	-0.614091	-10.6727	0.0397929	-0.121316
G. oceanica	Oxi NH3	Continuous	21	11.5575	101100	3.403	0.75	0.104031	0.032414	8.2	1972.4	11.6826	1748.9	-223.501	12.7795	8.16	-0.04	0.490196	11.4491	-0.233558	2.03997	Included	-4.42404	0.128309	-10.4701	0.0870685	-4.81875	0.0697204	-0.394711	-10.6925	0.127255	-0.394507
G. oceanica	Oxi NH3	Continuous	21	11.5575	177800	2.885	0.96	0.102819	0.032414	8.12	1774.14	12.827	1748.9	-25.2345	1.44288	8.16	0.04	0.490196	11.4491	-1.37792	12.0353	Included	-4.42404	0.128309	-10.4701	0.0870685	-4.85273	0.0344016	-0.428688	-10.6018	0.0385695	-0.302849
G. oceanica	Oxi NaOH	Continuous	21	11.5575	375000	2.8375	0.24	0.0152728	0.0533206	7.95	1939.87	21.2328	1922.2	-17.6739	0.919462	8	0.05	0.625	18.645	-2.58781	13.8793	Included	-4.50399	1.04544	-10.6737	0.465799	-3.2825	0.0490111	1.22149	-10.2992	0.0243099	0.208708
G. oceanica	Oxi NaOH	Continuous	21	11.5575	375000	2.8375	0.24	0.0152728	0.0533206	7.95	1939.87	21.2328	1922.2	-17.6739	0.919462	8	0.05	0.625	18.645	-2.58781	13.8793	Included	-4.50399	1.04544	-10.6737	0.465799	-3.28385	0.063311	1.22014	-10.3085	0.0346068	0.199316
G. oceanica	Oxi NH3	Continuous	21	11.5575	86209	3.36825	0.75	0.0407995	0.00512012	8.15	4393.13	29.4844	4513.93	120.805	2.67627	8.15	0	0	30.2951	0.810781	2.67627	Included	-4.137	0.319284	-11.204	1.21622	-4.62923	0.0444559	-0.492231	-10.8654	0.0811092	0.172591
G. oceanica	Oxi NH3	Continuous	21	11.5575	77288	3.5685	0.82	0.0453025	0.00279917	8.14	4470.41	30.758	4513.93	43.5175	0.964072	8.15	0.01	0.122699	30.2951	-0.462854	1.52782	Included	-4.00125	0.319284	-11.204	1.21622	-4.662	0.0334066	-0.66075	-10.68	0.0331662	0.359994
G. oceanica	TLE	Continuous	21	11.5575	147100	3.241	1.45	0.0517742	0.0533206	8.09	5551.74	43.2229	5705	153.26	2.68641	8.12	0.03	0.369458	41.2471	-1.9758	4.79016	Included	-2.41341	1.04544	-10.6737	0.465799	-3.626	0.0510947	-1.21259	-10.4973	0.0882773	0.00845887
G. oceanica	Oxi NaOH	Continuous	21	11.5575	147100	3.241	1.45	0.0517742	0.0533206	8.09	5551.74	43.2229	5705	153.26	2.68641	8.12	0.03	0.369458	41.2471	-1.9758	4.79016	Included	-2.41341	1.04544	-10.6737	0.465799	-3.66	0.0377124	-1.24659	-10.5067	0.0818535	-0.00097352
G. oceanica	Oxi NH3	Continuous	21	11.5575	147100	3.241	1.45	0.0511343	0.0533206	8.09	5621.21	43.7638	5705	83.786	1.46864	8.12	0.03	0.369458	41.2471	-2.51669	6.1015	Included	-2.41341	1.04544	-10.6737	0.465799	-3.39727	0.0310691	-0.98386	-10.6191	0.0568018	-0.114598
G. oceanica	TLE	Continuous	24	11.3253	126100	3.6315	0.67	0.0887534	0.0279976	8.29	2929.83	13.0544	2543.59	-386.236	15.1846	8.15	-0.14	1.71779	16.182	3.12761	19.3277	Included	-2.08654	0.33551	-10.3365	0.126782	-1.26	0.0216025	0.826536	-11.3067	0.0286744	-0.541427
G. oceanica	Oxi NaOH	Continuous	24	11.3253	126100	3.6315	0.67	0.0887534	0.0279976	8.29	2929.83	13.0544	2543.59	-386.236	15.1846	8.15	-0.14	1.71779	16.182	3.12761	19.3277	Included	-2.08654	0.33551	-10.3365	0.126782	-1.23611	0.0624623	0.850425	-11.2783	0.0563964	-0.51277
G. oceanica	Oxi NH3	Batch	24	11.3253	119200	3.3045	1.2	0.137563	0.00157782	8.12	2001.79	13.7267	2114	112.205	5.30772	8.13	0.01	0.123001	14.139	0.412291	2.91599	Included	-2.7662	0.271321	-10.5957	0.49275	-3.56429	0.0588842	-0.798084	-11.8893	0.317546	-0.868946
G. oceanica	Oxi NH3	Batch	24	11.3253	73850	3.521	1.2	0.143019	0.00159889	8.13	2103.4	14.0681	2114	10.6003	0.501432	8.13	0	0	14.139	0.0708975	0.501434	Included	-3.14991	0.271321	-10.5957	0.49275	-3.35929	0.0663825	-0.209378	-11.2829	0.158719	-0.255409
G. oceanica	Oxi NaOH	Continuous	24	11.3253	116200	3.5801	0.67	0.0674001	0.00579512	8.16	2731.51	16.9469	2543.59	-187.912	7.38767	8.15	-0.01	0.122699	16.182	-0.764905	4.72689	Included	-1.51099	0.33551	-10.3365	0.126782	-0.865294	0.069292	0.645695	-11.0029	0.0741036	-0.234275
G. oceanica	Oxi NH3	Continuous	24	11.3253	178200	3.4775	0.67	0.0578337	0.0178431	8.08	2533.18	19.1841	2543.59	10.411	0.409302	8.15	0.07	0.858896	16.182	-3.0021	18.5521	Included	0.795798	0.33551	-10.3365	0.126782	-0.0728571	0.208273	-0.868656	-11.3407	0.143201	-0.575865
G. oceanica	TLE	Continuous	27	11.1	183500	3.589	0.87	0.0984084	0.020527	8.02	1806.04	15.1092	2047	240.957	11.7712	8.205	0.185	2.25472	10.7671	-4.34204	40.3268	Included	-2.57596	0.820994	-10.3919	0.131998	-1.96611	0.0766767	0.609845	-11.6722	0.118395	-0.258297
G. oceanica	Oxi NaOH	Continuous	27	11.1	183500	3.589	0.87	0.0984084	0.020527	8.02	1806.04	15.1092	2047	240.957	11.7712	8.205	0.185	2.25472	10.7671	-4.34204	40.3268	Included	-2.57596	0.820994	-10.3919	0.131998	-1.96167	0.0462181	0.614289	-11.7389	0.0838576	-0.325753
G. muellerae	Oxi NH3	Batch	6	12.8329	129900	2.4585	0.1	0.00813052	0.00264797	8.25	1987.49	14.399	2163.56	176.068	8.13787	8.27	0.02	0.241838	14.9265	0.527443	3.53361	Included	-3.0911	0.0207043	-11.0899	0.388897	-3.97273	0.0204899	-0.88163	-7.62	0.083883	0.0909534
G. muellerae	Oxi NH3	Batch	6	12.8329	106900	2.3435	0.1	0.00765707	0.00267487	8.27	2112.5	14.5741	2163.56	51.066	2.36027	8.27	0	0	14.9265	0.352306	2.36028	Included	-3.0911	0.0207043	-11.0899	0.388897	-3.66364	0.0201236	-0.572539	-7.51364	0.0810469	0.198128
G. muellerae	Oxi NH3	Batch	12	12.2985	78034	2.2405	0.58	0.0378816	0.0158166	8.19	2240.83	16.3352	2467.42	226.596	9.1835	8.23	0.04	0.486027	16.3016	-0.0336417	0.20637	Included	-4.7052	0.204459	-10.6871	0.991741	-4.67727	0.0578542	0.0279275	-8.62091	0.145256	0.0122695
G. muellerae	Oxi NH3	Batch	12	12.2985	122500	2.11	0.58	0.0274607	0.0205284	8.15	2640.03	21.2217	2467.42	-172.609	6.99551	8.23	0.08	0.972053	16.3016	-4.92009	30.1816	Included	-4.41605	0.204459	-10.6871	0.991741	-4.204	0.0402989	0.212052	-8.127	0.0502096	0.510349
G. muellerae	Oxi NH3	Batch	18	11.7969	141500	2.4695	0.41	0.0606911	0.00643028	8.37	1948.26	7.94417	1984.93	36.6743	1.84764	8.43	0.06	0.711744	6.92391	-1.02026	14.7353	Included	-3.60626	0.353064	-10.9154	0.339626	-4.49	0.0170561	-0.883738	-10.0409	0.0380083	0.0923309
G. muellerae	Oxi NH3	Batch	18	11.7969	124900	2.5325	0.41	0.0504302	0.00789773	8.34	2225.8	9.80445	1984.93	-240.872	12.1351	8.43	0.09	1.06762	6.92391	-2.88054	41.6029	Included	-4.10557	0.353064	-10.9154	0.339626	-4.36214	0.0290759	-0.256573	-10.0107	0.0581211	0.122831
C. leptoporus	Oxi NaOH	Batch	12	12.2985	696300	4.952	0.25	0.0328652	0.00464682	8.12	2074.56	17.9376	2484.45	409.895	16.4984	8.22	0.1	1.21655	16.8239	-1.11372	6.61988	Included	-2.81607	0.406269	-10.4327	0.47575	-5.15462	0.0935304	-2.33854	-11.0362	0.179123	-2.68404
C. leptoporus	Oxi NaOH	Batch	12	12.2985	696301	4.952	0.25	0.0328652	0.00464682	8.12	2074.56	17.9376	2484.45	409.895	16.4984	8.22	0.1	1.21655	16.8239	-1.11372	6.61988	Included	-2.81607	0.406269	-10.4327	0.47575	-5.03857	0.120467	-2.2225	-10.89	0.150618	-2.53626
C. leptoporus	Oxi NH3	Batch	12	12.2985	27616	5.915	0.25	0.0368238	0.00493778	8.09	2056.74	19.1226	2484.45	427.711	17.2155	8.22	0.13	1.58151	16.8239	-2.2987	13.6633	Included	-2.24152	0.406269	-10.4327	0.47575	-5.09714	0.273141	-2.85562	-10.9279	0.6558	-2.57454
Excluded data
G. oceanica	Oxi NH3	Continuous	15	12.0438	81269	3.1365	0.29	0.0200974		7.88	1492.81	21.5518	2112.01	619.198	29.318	8.03	0.15	1.868	21.3236	-0.228217	1.07025	Excluded	-5.03925	0.223262	-10.4701	0.318797	-5.02625	0.117998	0.0130018	-9.77125	0.401822	-0.72002
G. oceanica	Oxi NaOH	Batch	18	11.7969	1093000	2.6805	0.75	0.57131		8.67	920.942	1.67566	2012	1091.06	54.2275	8.3	-0.37	4.45783	9.81578	8.14012	82.9289	Excluded	9.13382	0.0341563	-10.3032	0.137732	-0.72375	0.0418143	-9.85757	-9.7425	0.0350892	-0.225056
G. oceanica	TLE	Batch	18	11.7969	1093000	2.6805	0.75	0.57131		8.67	920.942	1.67566	2012	1091.06	54.2275	8.3	-0.37	4.45783	9.81578	8.14012	82.9289	Excluded	9.13382	0.0341563	-10.3032	0.137732	-0.779412	0.0652119	-9.91323	-9.74176	0.0975123	-0.224314
G. oceanica	TLE	Batch	18	11.7969	1093000	2.6805	0.75	0.57131		8.67	920.942	1.67566	2012	1091.06	54.2275	8.3	-0.37	4.45783	9.81578	8.14012	82.9289	Excluded	9.13382	0.0341563	-10.3032	0.137732	-0.727895	0.0609209	-9.86171	-9.73947	0.136168	-0.222
G. oceanica	Oxi NH3	Batch	18	11.7969	365400	2.786	0.42	0.0752993		8.21	1209.11	7.3998	2376.52	1167.41	49.1227	8.12	-0.09	1.10837	18.1754	10.7756	59.2867	Excluded	-4.742	0.0186726	-10.617	0.163126	0.424	0.168772	5.166	-9.953	0.0447325	-0.120495
G. oceanica	Oxi NH3	Continuous	18	11.7969	264300	3.1755	0.61	0.0213966		7.68	1976.8	43.1099	2024	47.2025	2.33214	8.3	0.62	7.46988	9.87433	-33.2356	336.586	Excluded	-5.36347	0.0459012	-10.617	0.163126	-4.26692	0.0787776	1.09655	-10.0608	0.136295	-0.229354
G. oceanica	Oxi NH3	Continuous	18	11.7969	90000	3.301	0.61	0.0222423		7.68	1976.8	43.1099	2024	47.2025	2.33214	8.3	0.62	7.46988	9.87433	-33.2356	336.586	Excluded	-5.36347	0.0459012	-10.617	0.163126	-4.34583	0.0462706	1.01764	-10.125	0.0978519	-0.294239
G. oceanica	Oxi NaOH	Batch	27	11.1	985600	2.3845	0.12	0.103041		8.56	650.985	1.32236	2375.61	1724.63	72.5971	8.11	-0.45	5.54871	15.8919	14.5695	91.679	Excluded	-4.162	0.433279	-10.3919	0.131998	-0.852	0.0526878	3.31	-11.9967	0.0392711	-0.586627
G. oceanica	Oxi NaOH	Batch	27	11.1	985601	2.3845	0.12	0.103041		8.56	650.985	1.32236	2375.61	1724.63	72.5971	8.11	-0.45	5.54871	15.8919	14.5695	91.679	Excluded	-4.162	0.433279	-10.3919	0.131998	-0.894286	0.056406	3.26771	-11.9736	0.0281849	-0.563252
G. oceanica	Oxi NaOH	Continuous	27	11.1	203000	3.433	0.87	0.226655		8.12	961.838	6.27492	2047	1085.16	53.0123	8.205	0.085	1.03595	10.7671	4.49223	41.7216	Excluded	-1.41489	0.820994	-10.3919	0.131998	-1.97562	0.0827624	-0.56073	-11.6881	0.0880496	-0.274388
G. oceanica	TLE	Batch	27	11.1	223000	1.8845	0.12	0.00553935		7.91	1776.45	19.4402	2291.67	515.219	22.4823	8.11	0.2	2.46609	15.3304	-4.10979	26.8082	Excluded	-4.77475	0.433279	-10.3919	0.131998	-1.208	0.128515	3.56675	-11.638	0.0685274	-0.223671
G. oceanica	Oxi NH3	Batch	27	11.1	223000	1.8845	0.12	0.00553935		7.91	1776.45	19.4402	2291.67	515.219	22.4823	8.11	0.2	2.46609	15.3304	-4.10979	26.8082	Excluded	-4.77475	0.433279	-10.3919	0.131998	-1.266	0.0986103	3.50875	-11.687	0.140716	-0.273249
G. muellerae	Oxi NH3	Batch	12	12.2985	1669000	3.457	0.58	1.56843		8.85	477.699	0.608757	2640.03	2162.33	81.9055	8.15	-0.7	8.58896	21.2217	20.6129	97.1314	Excluded	7.1156	0.13868	-11.4382	0.182327	0.816154	0.237569	-6.29945	-8.73077	0.278221	0.660991
C. leptoporus	Oxi NH3	Batch	18	11.7969	44014	5.265	0.52	0.124443		7.9	805.097	10.4764	2262.03	1456.93	64.4082	8.12	0.22	2.70936	17.2998	6.82338	39.442	Excluded	-1.8045	0.0241178	-10.617	0.163126	-3.457	0.71564	-1.6525	-13.051	0.129958	-3.25455
C. leptoporus	Oxi NH3	Batch	18	11.7969	49820	5.3	0.52	0.0536857		7.85	1668.58	24.4456	2262.03	593.455	26.2355	8.12	0.27	3.32512	17.2998	-7.14584	41.3059	Excluded	-1.8055	0.01812	-10.617	0.163126	-4.31308	0.167992	-2.50758	-12.8831	0.0538352	-3.08442
