# Supplementary material for: Coccolithophorids precipitate carbonate in clumped isotope equilibrium with seawater
Source: Copernicus journal article supplement (doi:10.5194/egusphere-2023-2581), 2023-11-09
Supplement: Supplementary file 2 [file egusphere-2023-2581-supplement.zip › Supplement_submitted/Table S2.xlsx]

## Sheet: Sheet1
Correlations
Δ13Cc-DIC	n	ρ	p-value		Δ18Oc-sw	n	ρ	p-value		CO2aq	n	ρ	p-value		ΔΔ18Ooff	n	ρ	p-value
Gephyrocapsa DIC	37	-0.346554	0.04		G oceanica temp	31	0.94	7.23364e-15		DIC	40	0.83	5.19663e-11		Gephyrocapsa DIC	37	0.21	0.205605
Gephyrocapsa pH	37	-0.206831	0.219352		Gephyrocapsa temp	37	0.97	2.79146e-23							Gephyrocapsa pH	37	0.18	0.299872
Gephyrocapsa CO2aq	37	-0.209454	0.21		Continuous temp	28	0.92	3.35105e-12							Gephyrocapsa CO2aq	37	0.15	0.369831
Gephyrocapsa cell count	37	0.22	0.18		Batch temp	12	0.71	0.00949809							Gephyrocapsa t	37	-0.29	0.0774163
Gephyrocapsa ΔDIC	37	-0.256725	0.12507												Gephyrocapsa growth rate	37	-0.29	0.0833299
Gephyrocapsa t	37	0.06	0.74
All data DIC	40	-0.0310677	0.849071
All data pH	40	-0.118902	0.464928
All data CO2aq	40	-0.02295	0.888214
All data cell count	40	-0.287283	0.0722678
All data ΔDIC	40	-0.471899	0.00211118
All data t	40	0.145827	0.369261
ΔΔ47off all	n	ρ	p-value		ΔΔ47off continuous	n	ρ	p-value		ΔΔ47off batch	n	ρ	p-value
pH	40	0.17	0.28		pH	28	0.27	0.17		pH	12	-0.32	0.31
DIC	40	-0.01	0.95		DIC	28	-0.04	0.85		DIC	12	0.2	0.54
CO2aq	40	-0.09	0.59		CO2aq	28	-0.13	0.51		CO2aq	12	0.11	0.74
