# Supplementary material for: Coccolithophorids precipitate carbonate in clumped isotope equilibrium with seawater
Source: Copernicus journal article supplement (doi:10.5194/egusphere-2023-2581), 2023-11-09
Supplement: Supplementary file [file egusphere-2023-2581-AC1-supplement.pdf]

## Reviewer 1

### Collected comments

[Title] "clumped isotope equilibrium with seawater" is a rather surprising turn of phrase. Clumped isotope equilibrium is achieved between the different isotopologues of carbonate but not between the carbonate and water phases, contrary to oxygen-18 equilibrium.

**Re:** We have changed the title to better reflect our conclusions:

*"A well-constrained, coccolith-specific clumped isotope calibration of cultured coccolithophorids for marine temperature reconstructions"*

For some reason table 1 does not report either pCO<sub>2</sub> or pH. Is that to be expected? These would seem like important parameters.

**Re:** Thanks for highlighting the significance of these parameters. We included them in the Supplementary to avoid overcrowding the current Table 1.

in the abstract and elsewhere (see below), the phrase "do not have a significant effect" is a very ambiguous statement. Is it not significant because it is very small (e.g., <1 deg C equivalent) or because the observations are not very precise? When issuing these statements it is almost always worthwhile to state something like "no significant effect at the X ppm level". Needless to say, the implications are quite different depending on the value of X.

**Re:** We agree with the reviewer and have included the offsets or significance levels where applicable, with some examples listed below:

*L24-25: "...does not have a significant effect on  $\Delta_{47}$ , changing the parameters yields  $\Delta_{47}$ -temperature calibrations that agree within 1.2 ppm."*

*L402: "All regression lines fall within 0.0012‰ error of each other..."*

The last sentence of the abstract ("Thus, all biogenic specific calibrations can be used interchangeably and must be used for the reconstruction of calcification temperatures in biogenic carbonates.") is an extremely strong statement, which is not supported by the currently available evidence, and with a high potential of being misused to justify arbitrary interpretations in the future.

**Re:** We have changed this sentence to better reflect our conclusions. We now write:

*L30-32: "Thus, we suggest the use of our coccolith-specific calibration for further coccolith palaeoceanographic studies and that calibrations derived from laboratory-grown biogenic carbonates, in particular foraminifera, are desirable to reinforce the confidence of clumped isotope-based temperature reconstructions in palaeoceanography."*

The sentence explaining clumped isotopes in lines [25-26] is poorly worded. Abundance of <sup>13</sup>C-<sup>18</sup>O bonds primarily increases with d<sup>13</sup>C and d<sup>18</sup>O, with a second-order thermodynamic effect. Thus what increases as T decreases is the ratio between the actual <sup>13</sup>C-<sup>18</sup>O abundance and the corresponding stochastic (predicted) abundance.

**Re:** We reformulated the sentence to read:

*L36-37: "In a carbonate molecule, bonds between the rare heavy isotopes <sup>13</sup>C and <sup>18</sup>O can be formed and their excess abundance relative to a stochastic distribution is denominated as "clumping", which increases with decreasing temperature."*

Lines [30-34] seem to contradict the conclusions. For the conclusions of the manuscript to drastically upend prior ideas would require very strong new evidence and careful reassessment of preexisting evidence, which is simply missing.

**Re:** We have changed this section significantly to better reflect our aims and conclusions of this study.

*L48-60: “Empirical calibrations between temperature and  $\Delta_{47}$  have been established for temperatures between 0°C and 1100°C for inorganic carbonates (Kele et al., 2015; Bonifacie et al., 2017; Kelson et al., 2017; Müller et al., 2019; Swart et al. 2019; Jautzy et al. 2020; Anderson et al., 2021). Further empirical studies on biogenic carbonates, such as for foraminifera, coccoliths, gastropods, and bivalves, have found similar relationships between  $\Delta_{47}$  and calcification temperature (Katz et al., 2017; Peral et al., 2018; Leutert et al., 2019; Piasecki et al., 2019; de Winter et al., 2022; Huyghe et al., 2022), although specific types of biogenic carbonates such as shallow-water corals (Spooner et al., 2016; Davies et al., 2022), juvenile bivalves (Huyghe et al., 2022), and brachiopods (Bajnai et al., 2018; Davies et al., 2023; Letulle et al., 2023) do not. However, there are clear discrepancies between most inorganic calibrations (Swart et al. 2019; Jautzy et al. 2020; Anderson et al., 2021; Fiebig et al., 2021) and an often used, generalised biogenic calibration (Meinicke et al., 2020). One interpretation is that this discrepancy results from uncertainties in the calculation of calcification temperatures for planktonic foraminifera and is resolved with alternate approach to calcification temperature estimation (Daëron and Gray, 2023). With this study using cultured coccoliths we generate biogenic carbonate under well-constrained temperature conditions, so there is little uncertainty in the calcification temperatures.”*

Line [42] Jautzy et al. is not biogenic

**Re:** We have changed this section and acknowledge the comment.

It should be expected by default, particularly in a EGU journal, that raw analytical data be provided to allow for future reprocessing efforts.

**Re:** All data is included in supplementary and in the process of being uploaded to EarthChem.

The comparison of cleaning methods is always useful, as many of these efforts are never formally published.

**Re:** We thank the reviewer for the encouraging words and hope our small compilation is useful for future studies.

[173] To clarify: IAEA-C2 was treated as an unknown sample? What is the long-term SD of its replicate-level  $\Delta_{47}$  measurements (is this the sigma values quoted on line 174)? How many IAEA-C2 replicates were measured?

**Re:** We have clarified this, as yes IAEA-C2 was treated as an unknown sample and the long-term standard deviation is as given in the text. A total of 241 replicates were measured and is now also included in the text.

Do analytical uncertainties account for standardization errors in any way?

**Re:** We have included a sentence regarding this, we do not account for them yet we measured in a 50:50 sample to standard ratio and any uncertainty related to the standardisation should be low.

*L200-202: “...without taking into account the standardisation error. However, as the measurements are carried out with a 50:50 standard to sample ratio, the additional uncertainty related to standardisation would be small (Bernasconi et al. 2021).”*

[190] How was the DIC uncertainty determined? Surely not by computing the SD of two repeated measurements, I assume.

**Re:** We reworded this statement to better explain what we measured and used as standard deviation.

*L216-218: "Each measurement was repeated twice with the same centrifuged media in quick succession to reduce CO<sub>2</sub> exchange with the atmosphere, which gave an average DIC and uncertainty for each measured replicate. At least three of these replicates were taken and measured for each experiment."*

[213] minor comment: using the SD of repeated d13C measurements (N=?) is reasonable when dealing with random noise, but if d13C values are found to be systematically drifting, it might be more accurate to characterize uncertainties using the total range of measured values.

**Re:** This is indeed what was done and the sentence was reworded to better reflect and clarify this point.

*L240-242: "We report the uncertainty of the fractionation between coccolith calcite and DIC ( $\Delta^{13}C_{DIC}$ ) from both the standard deviation of  $\delta^{13}C_c$  and the range of all measured  $\delta^{13}C_{DIC}$  over the course of the sampled culture, to take into account the potential effect of DIC evolution and drift, and will be used in subsequent figures."*

Is there any interpretation of / conclusion to the results of section 3.1.2 (Carbon isotopes)? If there are none, why include these results at all? It seems like a missed opportunity.

**Re:** We have expanded our discussion on carbon isotope vital effects, which were presented in the previous discussion section 4.1, now section 4.2 with reorganization of the discussion. We present the carbon isotopes to delineate the vital effects shown in stable isotopes and evaluate whether they might be related to any variation in the  $\Delta_{47}$  for our cultures. In response to a subsequent comment on the discussion, we detail the modifications to the text and figures.

[260] "The  $\Delta_{18O_{c-sw}}$  is thus genus- but not species-specific." That is a true statement for this data set. Whether it applies in general, or simply to other species of the same genus, or to different experimental conditions, would require a better physical understanding of the processes driving oxygen-isotope fractionation.

**Re:** We have clarified this sentence to state that:

*L288: "The available data indicate that the range of  $\Delta^{18}O_{c-sw}$  is similar within the *Gephyrocapsa* genus."*

[265-266] "There is no [clumped isotope] difference between species or genus at given temperatures." Again, this statement is very general but should be qualified (no obvious difference at the X ppm level).

**Re:** We have in the revision included the quantification of our offset and significance.

*L293-294: "There is no resolvable difference between species or genus at given temperatures; differences are within  $\pm 0.016\%$  of each other."*

[269-271] "in order to fully evaluate potential vital effects in the  $\Delta_{47}$ -temperature relationship in coccolith calcite, we first characterize and discuss the vital effects in carbon and oxygen isotopes and compare them to previous culture studies." But this is never actually done (ie, discussing  $\Delta_{47}$  equilibrium/disequilibrium in the context of oxygen-18 and carbon-13 disequilibrium).

**Re:** In the revision, we have rearranged and clarified the initial sections on the carbon and oxygen vital effects, focussing on potential mechanisms. The discussion of the vital effects in the context of  $\Delta_{47}$  is now expanded upon in section 4.3 and an additional figure is provided (Fig. S6).

[280-281] "An increase in CO<sub>2</sub>(aq) relative to the cellular carbon demand will result in a decrease in  $\Delta^{13}C_{c-DIC}$ ": This sentence simply repeats content from the previous one.

**Re:** We agree and removed the sentence.

The carbon-13 discussion raises seemingly interesting observations (that  $\Delta^{13}\text{C}_{\text{c-DIC}}$  does not appear to be negatively correlated with  $[\text{CO}_2\text{aq}]$ , contrary to model predictions). But after reading this section we don't really know if this is a problem with the models or if these models would actually predict a lack of  $\Delta^{13}\text{C}_{\text{c-DIC}}/[\text{CO}_2\text{aq}]$  correlation for these particular experimental conditions.

**Re:** We have reworded and clarified this section. To provide a more complete analysis of the results, we have added to Figure 2 the results of a model of the carbon isotope fractionation in coccoliths as published by McClelland et al 2017 (see below). This model shows the expected carbon isotopic fractionation as a function of  $\tau$  (C demand/supply) and the PIC:POC (calcite/organic carbon) ratio of coccolithophores, and illustrates the processes that can contribute to the spread in our observations. We have fully revised the discussion in 4.2 to comment on this figure and the implications for processes contributing to variable carbon isotopic fractionation in our coccoliths. We acknowledge that fitting our data to one of the calcification models would be a useful and interesting addition but is outside the scope of this study. We hope that our provision of the full isotope analyses would enable these results to be useful to future modelling endeavours.

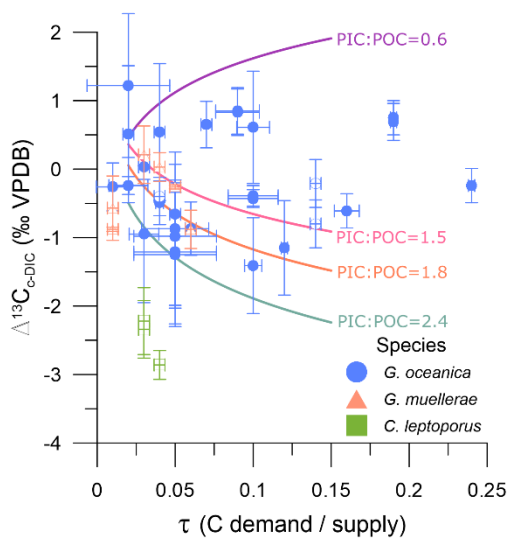

To provide a more complete assessment of any relationship between vital effects and the clumped isotope composition, we have added the correlations with vital effects in Table 3 and a Supplemental Figure (Fig. S6) and discuss in section 4.3 that there is no correlation between the carbon isotope vital effects and the  $\Delta_{47}$  offsets.

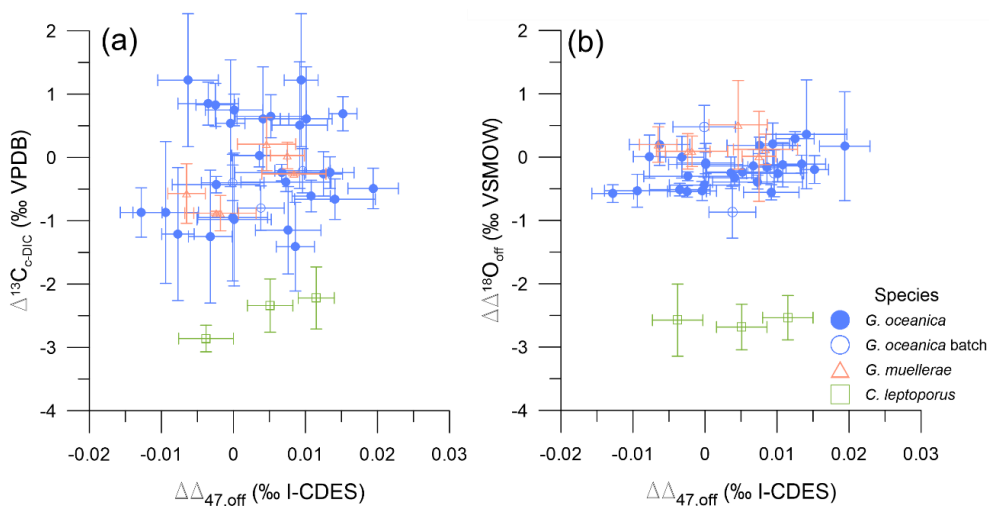

[294-295] "[equilibrium oxygen isotope fractionation between calcite and water is inferred to be represented by] laboratory experiments using 295 carbonic anhydrase (CA) to maintain oxygen isotopic exchange between DIC and H<sub>2</sub>O (Watkins et al., 2013; 2014)." This is simply wrong, as clearly stated by various authors over the years, including for example Watkins et al. (2013), who wrote that "based on this and the comparison to Ca isotopes, it is likely that neither ours nor any other experimental study has yielded the equilibrium value of  $\Delta^{18}\text{O}_{\text{c-w}}$ , which could be larger than the measured values by about 2‰."

**Re:** We acknowledge this comment and have rewritten this section. This section now reads:

*L307-311: "At a given temperature, equilibrium oxygen isotope fractionation between calcite and water is inferred to be most closely represented by natural carbonates precipitated at extremely slow rates and independent of pH (Coplen, 2007; Daëron et al., 2019). The model of Watkins et al. (2013, 2014) approximates this equilibrium, and is shown as the 'equilibrium limit' in Fig. 3. This approximation is derived from their experimental setup, which is not necessarily in equilibrium, and therefore potential small growth rate and pH effects are still present."*

[296-297] "Non-equilibrium fractionation effects [manifest as] lower  $\Delta^{18}\text{O}_{\text{c-w}}$ ". As written, this statement suggests that non-equilibrium fractionation is always associated with <sup>18</sup>O depletion. This is clearly not the case for effects caused by CO<sub>2</sub> degassing (Guo et al. 2020, GCA).

**Re:** We agree and have clarified this statement to include more nuance.

*L311-313: "Non-equilibrium fractionation effects between DIC and calcite that manifest at faster growth rates in experiments both with and without carbonic anhydrase (CA) include lower  $\Delta^{18}\text{O}_{\text{c-w}}$ , and a pH-dependence."*

[297-298] "This effect presumably occurs because calcite forms from both bicarbonate and carbonate ions in proportion to their abundance in solution" That might be in some cases, but not necessarily, see Devriendt (2017) model and discussion.

**Re:** Indeed, we have reworded this statement and included more nuance.

*L313-314: "This effect presumably but not necessarily occurs because calcite forms from both bicarbonate and carbonate ions in proportion to their abundance in solution."*

[300-301]: "This process is illustrated by the 'kinetic limit' in Fig. 3" This kinetic limit is actually the "fast-growth" limit described by Watkins et al. (2014), where crystallization fluxes are an order of magnitude greater than the opposing dissolution fluxes. It exists at all pH values (but the value of the "fast-growth"  $\Delta^{18}\text{O}_{\text{c-w}}$  limit varies as a function of pH). The "kinetic limit" equation in the caption of fig. 3 is attributed to Watkins et al. (2014) but I could not find its origin in that paper. What's more, there is no mention that this "fast-growth" limit varies as a function of pH, nor of what pH was used to compute this formula. Finally, the text as written does not make it clear at all that these concepts only apply to DIC-cc fractionation, which are additively combined with disequilibrium fractionation between water and DIC.

**Re:** We have included the parameters used to fit the kinetic limit from the model of Watkins et al. (2013, 2014) and reworded this section for clarification.

*L316-324: "Here, a pH of 8.3 at the crystallisation-site and the fastest growth rate is assumed in the model of Watkins et al. (2013, 2014) and Watkins and Devriendt (2022), with which the 'kinetic limit' is derived and illustrated in Fig. 3. This gives an approximate 2‰ offset and incorporates a large range of experimentally derived and modelled, in-presence of CA, precipitated inorganic calcite. Additionally, numerous experiments and potentially many natural biogenic and abiogenic systems may precipitate calcite from a solution in which equilibrium between DIC and H<sub>2</sub>O is not maintained due to a lack of*



*CA or fast calcification rates (Devriendt et al., 2017; Daëron et al. 2019). Rayleigh fractionation of oxygen isotopes in the internal DIC pool occurs as a result, which is transferred to the isotopic composition of the calcite and leads to lower  $\Delta^{18}\text{O}_{c-w}$  values, thus exacerbating the disequilibrium fractionation potentially present between the DIC and calcite as described above.*"

[307-310] "Models also suggest this for biogenic carbonates such as foraminifera and bivalves, as the magnitude of potential  $\Delta_{47}$  disequilibrium is below the current analytical resolution for  $\Delta_{47}$  measurements (Defliese and Lohmann, 2015; Watkins and Hunt, 2015; Devriendt et al., 2017)." There are several datasets providing evidence for biogenic calibrations being statistically indistinguishable from inorganic/equilibrium relationships (eg Anderson et al., 2021; Daeron & Gray, 2023). Also, Devriendt et al. (2017) do not consider clumped isotopes at all.

**Re:** We have rewritten this section to clarify that we initially focus on models and that indeed biogenic calibration studies are similar to the inorganic/equilibrium relationship. We also mention certain biogenic carbonates such as corals and brachiopods that do not coincide with the inorganic relationship. Furthermore, models suggest a pH and growth rate dependence on the  $\Delta_{47}$  values and must be further explored in biogenic carbonates.

*L327-332: "Models also suggest little to no  $\Delta_{47}$  disequilibrium for biogenic carbonates such as foraminifera and bivalves, as the magnitude of potential  $\Delta_{47}$  disequilibrium is below the current analytical resolution for  $\Delta_{47}$  measurements although this is pH and growth rate dependent (Defliese and Lohmann, 2015; Watkins and Hunt, 2015; Watkins and Devriendt, 2022). However, this does not hold for corals, brachiopods, and speleothems, where systematic  $\delta^{18}\text{O}$  and  $\Delta_{47}$  disequilibria are present, and should be explored further in more biogenic carbonates (Watkins and Hunt, 2015; Guo and Zhou, 2019, Guo, 2020)."*

[344-347] The emphasis on using a bivariate regression method does not seem warranted, given that errors in Y are about 100 times larger than errors in X.

**Re:** We have clarified this statement, we used the York regression to calculate our calibration relationship. A standard linear regression would indeed underestimate the error but for our calibration is statistically indistinguishable from the York regression ( $\Delta\Delta_{\text{off}} \pm 0.0007$ ).

*L387-392: "In order to calculate a reliable coccolith  $\Delta_{47}$ -temperature regression, we used a simple least-squares fitting following Williamson (1968) and York et al. (2004), using the Excel spreadsheet by Cantrell (2008). This methodology considers the uncertainties from both the  $\Delta_{47}$  and temperature measurements. While the omni-variant generalised least squares regression would be better suited, as this incorporates the full error covariance (Daëron and Vermeesch, 2024), our data is standardised through reference materials in a moving time window and thus cannot be analysed through this method."*

[349-355] Starting with a *G. oceanica* regression and then adding the other two species is not the traditional way of performing such "significance evaluations", and for good reason. A more acceptable approach is to perform some kind of ANCOVA analysis, as was done by Petersen et al. (2019) for example.

**Re:** We have included more cautionary and nuanced wording in this section. Since we had only one temperature for three  $\Delta_{47}$  datapoints for *C. leptoporus*, we could not generate a regression for this dataset and we felt that our approach was justified. Especially as this approach is only used in this section to determine the potential presence of species-specific differences.

*L394-398: "In order to determine potential species- or genus-dependent effects, an unorthodox approach was initially tested. *G. oceanica* contains the most diverse and largest range of temperature datapoints, while *C. leptoporus* only contains one temperature point and three  $\Delta_{47}$  data points. Thus,*

*the other two species' datasets will be successively included and evaluated for significance relative to the G. oceanica dataset."*

[350-351] "each  $\Delta_{47}$  measurement and uncertainty is taken individually as to have an equal contribution of each datapoint to the final calibration." Doing so artificially decreases the X error by a factor of  $\sqrt{N}$ , where N is the number of replicates for a given experiment, because the N data points (X,Y) are wrongly treated as having independent errors in X. Although this is ultimately irrelevant given that errors on Y very strongly dominate the regression weights (see above), it is wrong to present this as a sound approach.

**Re:** We have reworded this section to the following:

*L398-399: "Further, each biological and technical  $\Delta_{47}$  sample and uncertainty are taken individually as to have an equal contribution of each datapoint to the final calibration."*

[354-355] "All regression lines fall within error of each other, which shows there is no species- or genus-specific vital effect on the  $\Delta_{47}$ -temperature relationship" As pointed out above about section 3.2, This statement might be true in the context this particular data set, with analytical uncertainties of a given magnitude, but for it to be useful in a more general context — particularly paleoclimate reconstructions —, you need to quantify this level of uncertainty. It would be very different to write "no vital effect on  $\Delta_{47}$  larger than 0.001 ‰" and "no vital effect on  $\Delta_{47}$  larger than 0.020 ‰". I do not need to belabor that point; in the first case, this means that using a coccolith-specific calibration is unlikely to ever have a detectable effect given current analytical limits. In the second case, this means that reconstructing coccolith paleotemperatures based on an equilibrium  $\Delta_{47}$  calibration may or may not produce systematic bias on the order of 20 ppm (~7 degrees C). It is crucial to know where we currently stand on this spectrum.

**Re:** We thank the reviewer for this very constructive comment and we included the range in offsets between which all regression lines fall. This is 1.2 ppm.

*L402-403: "All regression lines fall within 0.0012‰ error of each other, which shows that with the available data there is no species- or genus-specific vital effect on the  $\Delta_{47}$ -temperature relationship."*

Section 4.5 appears superfluous. As pointed out in the text, the results of Katz et al. (2017) predate the Intercarb scale and can probably not reliably be converted to match the new data. So why attempt to combine data measured in different scales, then decide to use the previous regression anyway? Odds are that someone will eventually decide to disregard these methodological issues and use this combined equation anyway. Why facilitate bad practice?

**Re:** We agree and have shortened this section.

*L431-436: "The similar culturing study of three coccolithophore species by Katz et al. (2017) also found no species-specific vital effects affecting the  $\Delta_{47}$  values and a consistent  $\Delta_{47}$ -temperature correlation. However, the study was conducted before the introduction of the I-CDES standardisation methodology using carbonates and used gas-based standardization, consequently the data could have a systematic difference that cannot be resolved with certainty. Thus, when comparing to other calibration studies we will not include Katz et al. (2017) in the dataset and use Eq. 4 as a coccolith  $\Delta_{47}$ -temperature calibration, which is only based on our culture data in the I-CDES frame."*

Section 4.5: The authors are apparently aware of the recent study by Daeron & Gray (2023), since they cite it and use one of their calibration equations, but Daeron & Gray argued, rather convincingly in my opinion, that the foram temperatures originally assigned done by Peral et al. (2018) and Meinicke et al. (2020) were biased by up to several degrees. It is thus awkward to cite Daeron & Gray and still go with the original, biased calibrations of Peral et al. & Meinicke et al. without taking the trouble to spell out

why Daëron & Gray's claims (that the original temperature assignments should be corrected, and that planktonic foraminifera D47 agrees well with inorganic equilibrium calibrations) should be disregarded.

**Re:** We acknowledge and agree with this comment and have reworded this section to better reflect our, now revised, conclusions. We think that the recalculation done by Daëron & Gray (2023) is valid yet there are some minor arguments that warrant caution, and our reworded section reflects this.

*L468-480: “To a certain degree, offsets are also likely due to the uncertainty related to the determination of calcification temperatures in previous calibrations based on foraminifera collected from core tops. Often indirectly inferred or estimated from other proxies, these uncertainties in the calcification temperatures can result in large variabilities, obscure potential effects related to temperature, and can result in differences between calibrations. Meinicke et al. (2020) compared and discussed three different methods of determining the calcification temperature of the foraminifera used in their study, and concluded that using their oxygen isotope composition and the temperature calibration of Shackleton et al. (1974) provides the most robust estimate of the true calcification temperatures. In an extensive study, Daëron and Gray (2023) re-determined the oxygen isotope fractionation in the foraminifera species that were used by Meinicke et al. (2020) and Peral et al. (2018) for their clumped isotope calibrations using samples from laboratory cultures and plankton tows. They concluded that foraminifera calcification temperatures are best approximated by using the Kim and O’Neil (1997) calibration with species-specific offsets. They tested this concept by comparing the calcification temperatures determined for the Meinicke et al. (2020) and Peral et al. (2018) datasets, with reconstructed water column temperatures at the sites of the core tops (Fig. 7 in Daëron and Gray, 2023), and concluded that this is a better estimate of calcification temperatures than previously published. The applications of these revised species-specific oxygen isotope fractionation curves result in a non-systematic 1-2°C offset to colder temperatures from the original studies of Peral et al. (2018) and Meinicke et al. (2020; Fig. 9), especially at temperatures below 15°C and leads to a match between these two foraminifera-based calibrations and the inorganic calibration of Anderson et al. (2021). A close examination of Fig 7 in Daëron and Grey (2023) however, shows that the majority of their discordant samples (i.e. those that record temperatures outside the measured water column temperatures at the living depth of the specific species) are on the cold part of the calibration, 12 are below 13°C. Moreover, at least 7 of the ones that are considered concordant as the error bars overlap with the measured temperatures, have an average that is 1-2°C below the lowest measured temperature. About 27 of the 37 datapoints below 15 °C are either colder than the lowest temperature or only overlap with the coldest temperatures of the observed water column temperature range. We suggest that this would impart a cold bias on those samples. Further, the proposed extension of the calcification depths to 500 m would also give a cold bias and is not supported by foraminifera living depths (Schiebel and Hemleben, 2017). Based on these considerations, we suggest that the use of calcification temperatures from oxygen isotopes need further testing, ideally on laboratory cultured specimens and warrants caution.”*

[404-405] Regarding brachiopods, it is clearly problematic that their D47 does not only vary with temperature, as a result of DIC disequilibrium, as argued independently by Letulle et al. (2023) and Davies et al. (2023). Regarding the De Winter et al (2022) calibration, it should be pointed out that they analyzed (A) *Arctica islandica* with slow growth rates cultured at 1-3 degC and (B) *Arctica islandica* with growth rates >10 times greater than the previous ones, cultured at 15-18 degC. As reported by De Winter et al., Group A agrees quite well with Anderson et al., etc, but group B yields D47 values up to ~0.02 ‰ greater than expected from Anderson et al. It would be reasonable to wonder the results of group B reflect disequilibrium effects driven by very rapid growth rates, just like those observed by Huyghe et al. (2022) in juvenile oysters. But at any rate, the comparison shown here in fig. 8 does not use De Winter et al.'s *Arctica islandica* regression (their eq. 2). It is regrettably not stated which of De Winter's equations is used in fig. 9, but it should be noted that several of the calibration equations proposed by De Winter et al. include a very diverse mix of inorganic and biogenic samples up to 850



deg C. If one of these is used to argue for a distinction between "biogenic" and "inorganic" D47 calibrations, it would obviously be a major problem.

**Re:** We thank the reviewer for this excellent observation, we have adjusted this section thoroughly and included which de Winter equation and datasets we used for comparison.

*L444-446: "The dataset of Caldarescu et al. (2021) is included in the de Winter et al. (2022) calibration, using their equation 3. As suggested by Huyghe et al. (2022), the juvenile specimen that shows  $\Delta_{47}$  disequilibrium effects related to growth rate is not included."*

[422-423] "It is important to note that the vital effects in the coccolith carbon and oxygen isotopes have no impact on their  $\Delta_{47}$ ". Again (cf above), this statement must absolutely be quantified to be meaningful in any way.

**Re:** We have included a statement and clarified this.

*L412-416: "The non-significant correlation in  $\Delta^{13}C_{c-DIC}$  and  $\Delta\Delta_{47,off}$  for all setups, shows that there is no carbon isotope vital effect affecting the coccolith  $\Delta_{47}$ -values (Fig. S6). While there is a moderate, significant positive correlation between  $\Delta\Delta^{18}O_{off}-\Delta\Delta_{47,off}$ , it is only present for the continuous culture setup and has an  $r^2$  of 0.20. Thus, there is no evidence of an important impact of the oxygen isotope vital effect on coccolith  $\Delta_{47}$ -values."*

[423-425] Regarding the statement that theoretical models predict undetectable D47 disequilibrium even in the presence of detectable d13C and d18O disequilibria, this is simply not the case, as it is controlled by a free, unconstrained parameter ("epsilon" in Watkins & Hunt, 2015), which may or may not be equal to zero (cf fig. 6 of Watkins & Hunt).

**Re:** We have reworded and adjusted this section.

*L522-530: "Modelling studies for inorganic calcite, grown in the presence of CA and at growth rates and pH ranges relevant for coccolithophores, show offsets for carbon and oxygen and find kinetic disequilibrium effects that are pH and crystal-growth rate dependent (Hill et al., 2014; Watkins and Hunt, 2015; Uchikawa et al., 2021; Watkins and Devriendt, 2022). Between our cultured temperatures of 6-27°C and in saline conditions, a shift from pH 8 to 8.5 can give an offset of ~3‰ for  $\delta^{18}O$  and ~90 ppm for  $\Delta_{47}$  at very fast crystal growth rates ( $10^{-5} \text{ molm}^{-2}\text{s}^{-1}$ ) and offsets of ~1‰ for  $\delta^{18}O$  and ~1 ppm for  $\Delta_{47}$  for 1000x slower crystal growth rates ( $10^{-7} \text{ molm}^{-2}\text{s}^{-1}$ ; Fig. 6 in Watkins and Devriendt, 2022). The latter is comparable to estimated coccolith calcification rates of  $10^{-7}$ - $10^{-8} \text{ molm}^{-2}\text{s}^{-1}$  (Langer et al., 2006, 2012; Sett et al., 2014). Also, the modelled difference of  $\Delta_{47}$  between  $\text{HCO}_3^-$  relative to  $\text{CO}_3^{2-}$  at 25°C, with a difference of ~5 pH units, and saline conditions is ~0.034‰, and ~7‰ for  $\delta^{18}O$  (Hill et al., 2014; Watkins and Devriendt, 2022)."*
